# Supplementary material for: The Risk of Multiple Myeloma Is Reduced in Metformin Initiators: A Retrospective Cohort Study in Taiwanese Patients with Type 2 Diabetes Mellitus
Source: MDPI journal article supplement (doi:10.3390/cancers14225637), 2022-11-17
Supplement: s1 [file s1]

**Supplementary Table S1.** The disease diagnoses and their corresponding codes of the International Classification of Diseases, Ninth Revision, Clinical Modification (ICD-9-CM) used in the study.

| Disease diagnoses                             | ICD-9-CM codes                                                                                                                                                                                     |
|-----------------------------------------------|----------------------------------------------------------------------------------------------------------------------------------------------------------------------------------------------------|
| Diabetes mellitus                             | 250.XX                                                                                                                                                                                             |
| Multiple myeloma                              | 203.0                                                                                                                                                                                              |
| Hypertension                                  | 401–405                                                                                                                                                                                            |
| Dyslipidemia                                  | 272.0–272.4                                                                                                                                                                                        |
| Obesity                                       | 278                                                                                                                                                                                                |
| Nephropathy                                   | 580–589                                                                                                                                                                                            |
| Eye diseases                                  | 250.5: diabetes with ophthalmic manifestations<br>362.0: diabetic retinopathy<br>369: blindness and low vision<br>366.41: diabetic cataract<br>365.44: glaucoma associated with systemic syndromes |
| Stroke                                        | 430–438                                                                                                                                                                                            |
| Ischemic heart disease                        | 410–414                                                                                                                                                                                            |
| Peripheral arterial disease                   | 250.7, 785.4, 443.81, 440–448                                                                                                                                                                      |
| Hypoglycemia                                  | 251.0, 251.1, 251.2                                                                                                                                                                                |
| Chronic obstructive pulmonary disease         | 490–496                                                                                                                                                                                            |
| Tobacco abuse                                 | 305.1, 649.0, 989.84                                                                                                                                                                               |
| Alcohol-related diagnoses                     | 291, 303, 535.3, 571.0–571.3, 980.0                                                                                                                                                                |
| Heart failure                                 | 398.91, 402.11, 402.91, 404.11, 404.13, 404.91, 404.93, 428                                                                                                                                        |
| Parkinson's disease                           | 332                                                                                                                                                                                                |
| Dementia                                      | abridged codes of A210 or A222, or as ICD-9-CM codes of 290.0, 290.1, 290.2, 290.4, 294.1, 331.0–331.2, 331.7–331.9                                                                                |
| Head injury                                   | 959.01                                                                                                                                                                                             |
| Valvular heart disease                        | 394–396, 424, 746                                                                                                                                                                                  |
| Helicobacter pylori infection                 | 041.86                                                                                                                                                                                             |
| Epstein-Barr virus infection                  | 075, 710.3, 710.4                                                                                                                                                                                  |
| Hepatitis B virus infection                   | 070.22, 070.23, 070.32, 070.33, V02.61                                                                                                                                                             |
| Hepatitis C virus infection                   | 070.41, 070.44, 070.51, 070.54, V02.62                                                                                                                                                             |
| Human immunodeficiency virus disease          | 042                                                                                                                                                                                                |
| Cirrhosis of liver without mention of alcohol | 571.5                                                                                                                                                                                              |
| Other chronic nonalcoholic liver disease      | 571.8                                                                                                                                                                                              |

|                                                         |                                                                                                                                                                                                         |
|---------------------------------------------------------|---------------------------------------------------------------------------------------------------------------------------------------------------------------------------------------------------------|
| Autoimmune diseases                                     | 579.0: celiac disease<br>696.0: psoriatic arthritis<br>psoriasis: 696.1<br>710.0: systemic lupus erythematosus<br>710.1: systemic sclerosis<br>710.2: Sjogren's syndrome<br>714.0: rheumatoid arthritis |
| Organ transplantation                                   | V42                                                                                                                                                                                                     |
| Insomnia                                                | 780.52                                                                                                                                                                                                  |
| Malaise and fatigue                                     | 780.79                                                                                                                                                                                                  |
| History of some disorders of the central nervous system | 340–349                                                                                                                                                                                                 |
| Benign neoplasm of bone and articular cartilage         | 213.0–213.9                                                                                                                                                                                             |
| Bone fractures                                          | 800–829                                                                                                                                                                                                 |
| Ocular pterygium                                        | 372.40-372.44                                                                                                                                                                                           |
| Disorders of thyroid gland                              | 240–246                                                                                                                                                                                                 |
| Nutritional deficiencies                                | 260–269                                                                                                                                                                                                 |
| Depression                                              | 296 and 311                                                                                                                                                                                             |
| Cancer                                                  | 140–208                                                                                                                                                                                                 |

---
